# Supplementary material
Source: PubMed Central journal article supplement (PMC10394212)
Supplement: jmcp.2021.20389_s001.pdf [file jmcp.2021.20389_s001.pdf]

## **SUPPLEMENTARY MATERIALS**

### **Economic burden of peanut allergy in pediatric patients with evidence of reactions to peanut in the United States**

Michael S Blaiss, MD, FAAAAI; J Allen Meadows, MD; Shengsheng Yu, PhD; Dan R Robison, MBA; Steve L Hass, PhD; Kevin E Norrett, MS, MBA; Annie Guerin, MSc; Dominick Latremouille-Viau, MSc; and Stephen A Tilles, MD

#### **Additional Methods – Cost of Care Analysis**

**Supplementary Table 1.** List of Codes for Symptoms of Reaction to Peanuts<sup>1,2</sup> From At Least One or Two Organ Systems

**Supplementary Table 2.** Comparison of HRU excluding asthma in Privately Insured Pediatric Patients in the Peanut Allergy Cohort (n=3,084) vs. Peanut Allergy-Free Cohort (n=30,840), and in Medicaid Pediatric Patients in the Peanut Allergy Cohort (n=1,245) vs. Peanut Allergy-Free Cohort (n=12,450)

**Supplementary Figure 1.** Sample Selection Among Privately Insured Patients

**Supplementary Figure 2.** Sample Selection Among Medicaid Patients

## **Additional Methods – Cost of Care Analysis**

### *Data Source*

The OptumHealth Care Solutions, Inc. database includes administrative claims for over 19.9 million insured individuals covered by 84 self-insured Fortune 500 companies in all areas of the US. The Medicaid Claims Database contains administrative claims data for approximately 26.6 million Medicaid-eligible persons from the 6 states of Iowa, Kansas, Mississippi, Missouri, New Jersey, and Wisconsin. Both data sources include detailed information on history of health plan enrollment, demographics, diagnoses, procedures, claims for medical care received across all settings, as well as pharmacy services.

Data were de-identified and complied with the Health Insurance Portability and Accountability Act (HIPAA). Therefore, no reviews by an institutional review board were required.

### *Study Outcomes*

**Comorbidity burden:** In addition to a diagnosis of asthma, asthma was also identified in pharmacy claims with  $\geq 6$  prescription fills for any long-term or short-acting inhaled asthma medication in a 365-day window, or  $\geq 4$  prescription fills for the same long-term or short-acting inhaled asthma medication (excluding prednisolone/prednisone) in a 365-day window. In addition to a diagnosis of atopic dermatitis/eczema, atopic dermatitis/eczema was also identified in pharmacy claims with  $\geq 3$  prescription fills for an atopic dermatitis/eczema-related medication in a 365-day window. Depression was identified in medical claims based on ICD-9/10-CM codes defined by Elixhauser et al (1). Anxiety was identified in medical claims based on ICD-9/10-CM codes defined by the Diagnostic and Statistical Manual of Mental Disorders, 5<sup>th</sup> Edition (DSM-5®) (2).

**Direct healthcare costs:** Medical and pharmacy costs associated with asthma were identified using medical claims with a diagnosis for asthma, procedure for asthma medications, or pharmacy costs with asthma medications [inhalation only], leukotriene receptor antagonists, or biologics indicated for asthma. Costs associated with atopic dermatitis/eczema were identified using medical claims with a diagnosis for atopic dermatitis/eczema or pharmacy costs with atopic dermatitis/eczema treatments. Costs associated with other food allergies were identified using medical claims with a diagnosis for a food allergy other than peanut allergy. Costs

associated with mental health were identified using medical claims with pharmacy costs for antidepressant/antipsychotic/psychotherapeutic agents and mental health–related services from a mental health provider or place of service for mental health; these costs were not specific to anxiety or depression and included any mental health condition requiring the above medications or services.

## **References**

1. Elixhauser A, Steiner C, Kuzik D. Comorbidity Software. January 2004. HCUP Methods Series Report #2004-1. ONLINE. February 6, 2004. U.S. Agency for Health care Research and Quality. p.12-15. Available: <http://www.hcup-us.ahrq.gov/reports/ComorbiditySoftwareDocumentationFinal.pdf>
2. American Psychiatric Association. Diagnostic and Statistical Manual of Mental Disorders (DSM-5®). American Psychiatric Pub, 2013.

**Supplementary Table 1.** List of Codes for Symptoms of Reaction to Peanuts<sup>1,2</sup> From At Least One or Two Organ Systems

| Organ System                                  | Symptom                                 | Description                                                                | ICD-10 Code | ICD-9 Code                         |
|-----------------------------------------------|-----------------------------------------|----------------------------------------------------------------------------|-------------|------------------------------------|
| <b>From <math>\geq 1</math> Organ System</b>  |                                         |                                                                            |             |                                    |
| Upper Respiratory                             | Laryngeal                               | Edema of larynx                                                            | J38.4       | 478.6                              |
|                                               | Tongue                                  | Disease of tongue                                                          | K14.X       | 529.X                              |
|                                               | Uvula Edema                             | Other lesions of oral mucosa                                               | K13.79      | 528.9                              |
| Respiratory                                   | Respiratory failure                     | Acute respiratory failure, unspecified whether with hypoxia or hypercapnia | J96.00      | 518.81                             |
| Cardiovascular                                | Hypotension                             | Hypotension                                                                | I95.X       | 458.0, 458.2, 458.8, 458.9         |
|                                               | Cyanosis                                | Cyanosis                                                                   | R23.0       | 782.5                              |
| Other                                         | Confusion                               | Disorientation                                                             | R41.0       | 780.97                             |
|                                               | Collapse                                | Syncope and Collapse                                                       | R55         | 780.2                              |
|                                               | Loss of consciousness                   | Syncope and Collapse                                                       | R55         | 780.2                              |
|                                               | Incontinence                            | Incontinence                                                               | N39.X       | 599.0, 599.89, 599.9, 625.6, 788.3 |
| <b>From <math>\geq 2</math> Organ Systems</b> |                                         |                                                                            |             |                                    |
| Cutaneous                                     | Generalized pruritus                    | Generalized pruritus                                                       | L29.9       | 698.9                              |
|                                               | Urticaria                               | Idiopathic urticaria                                                       | L50.1       | 708.1                              |
|                                               | Angioedema                              | Angioneurotic edema                                                        | T78.3XX     | 995.1                              |
|                                               | Flushing or sensation of heat or warmth | Flushing                                                                   | R23.2       | 782.62                             |
| Lower and Upper Respiratory                   | Cough                                   | Cough Variant Asthma                                                       | J45.991     | 493.82                             |
|                                               | Wheezing                                | Wheezing                                                                   | R06.2       | 786.07                             |
|                                               | Asthma                                  | Asthma                                                                     | J45.XX      | 493.0, 493.1, 493.82, 493.9        |
|                                               | Shortness of breath                     | Shortness of breath                                                        | R06.02      | 786.05                             |
|                                               | Mild dyspnea                            | Dyspnea                                                                    | R06.0       | 786.02, 786.05                     |
|                                               | Rhinitis                                | Allergic rhinitis due to food                                              | J30.5       | 477.1                              |
|                                               | Sneezing                                | Sneezing                                                                   | R06.7       | 784.99                             |
|                                               | Nasal congestion                        | Nasal congestion                                                           | R09.81      | 478.19                             |
|                                               | Rhinorrhea                              | Other specified disorders of nose and nasal sinuses                        | J34.89      | 478.19                             |

|                  |                       |                           |         |                               |
|------------------|-----------------------|---------------------------|---------|-------------------------------|
|                  | Throat-clearing       | Pain in throat            | R07.0   | 784.1                         |
|                  | Marked Dysphagia      | Dysphagia                 | R13.1X  | 787.2, V41.6                  |
|                  | Stridor               | Stridor                   | R06.1   | 786.1                         |
| Conjunctival     | Conjunctival erythema | Conjunctival Hyperemia    | H11.4XX | 372.73                        |
|                  | Pruritus or Tearing   | Epiphora                  | H04.2XX | 375.2                         |
| Gastrointestinal | Abdominal cramps      | Abdominal and Pelvic Pain | R10.XX  | 789.09                        |
|                  | Vomiting              | Vomiting                  | R11.1X  | 078.82, 536.2, 569.87, 787.03 |
|                  | Nausea                | Nausea                    | R11.0   | 787.02                        |
|                  | Uterine Cramps        | Abdominal and Pelvic Pain | R10.XX  | 789.0, 789.6                  |
|                  | Diarrhea              | Diarrhea                  | K59.1   | 564.5                         |

- 
1. Symptoms considered as being reactions to peanuts using grading system from the World Allergy Organization Guidelines (Simons FE, Arduzzo LR, Bilo MB, et al. World Allergy Organ J. 2011;4(2):13-37; Simons FE, Arduzzo LR, Bilo MB, et al. Curr Opin Allergy Clin Immunol. 2012;12(4):389-399).
  2. Based on clinical experts' input.

**Supplementary Table 2.** Comparison of HRU excluding asthma in Privately Insured Pediatric Patients in the Peanut Allergy Cohort (n=3,084) vs. Peanut Allergy-Free Cohort (n=30,840), and in Medicaid Pediatric Patients in the Peanut Allergy Cohort (n=1,245) vs. Peanut Allergy-Free Cohort (n=12,450)

| HRU Components             | IR, PPPY              |                            |                   |
|----------------------------|-----------------------|----------------------------|-------------------|
|                            | Peanut Allergy Cohort | Peanut Allergy-Free Cohort | IRR (95% CI)      |
| Privately insured patients | n=3,084               | n=30,840                   |                   |
| IP admissions              | 0.03                  | 0.02                       | 1.31 (1.07–1.54)* |
| ED visits                  | 0.48                  | 0.27                       | 1.81 (1.70–1.94)* |
| Days with OP services      | 8.77                  | 5.11                       | 1.71 (1.60–1.85)* |
| Medicaid patients          | n=1,245               | n=12,450                   |                   |
| IP admissions              | 0.38                  | 0.30                       | 1.27(1.02–1.54)*  |
| ED visits                  | 0.73                  | 0.42                       | 1.74 (1.56–1.92)* |
| Days with OP services      | 18.96                 | 15.55                      | 1.22 (1.15–1.29)* |

\* $p < 0.05$ .

CI, confidence interval; ED, emergency department; HRU, healthcare resource utilization; IP, inpatient; IR, incidence rate; IRR, incidence rate ratio; OP, outpatient; PPPY, per-patient-per-year.

## Supplementary Figure 1. Sample Selection Among Privately Insured Patients

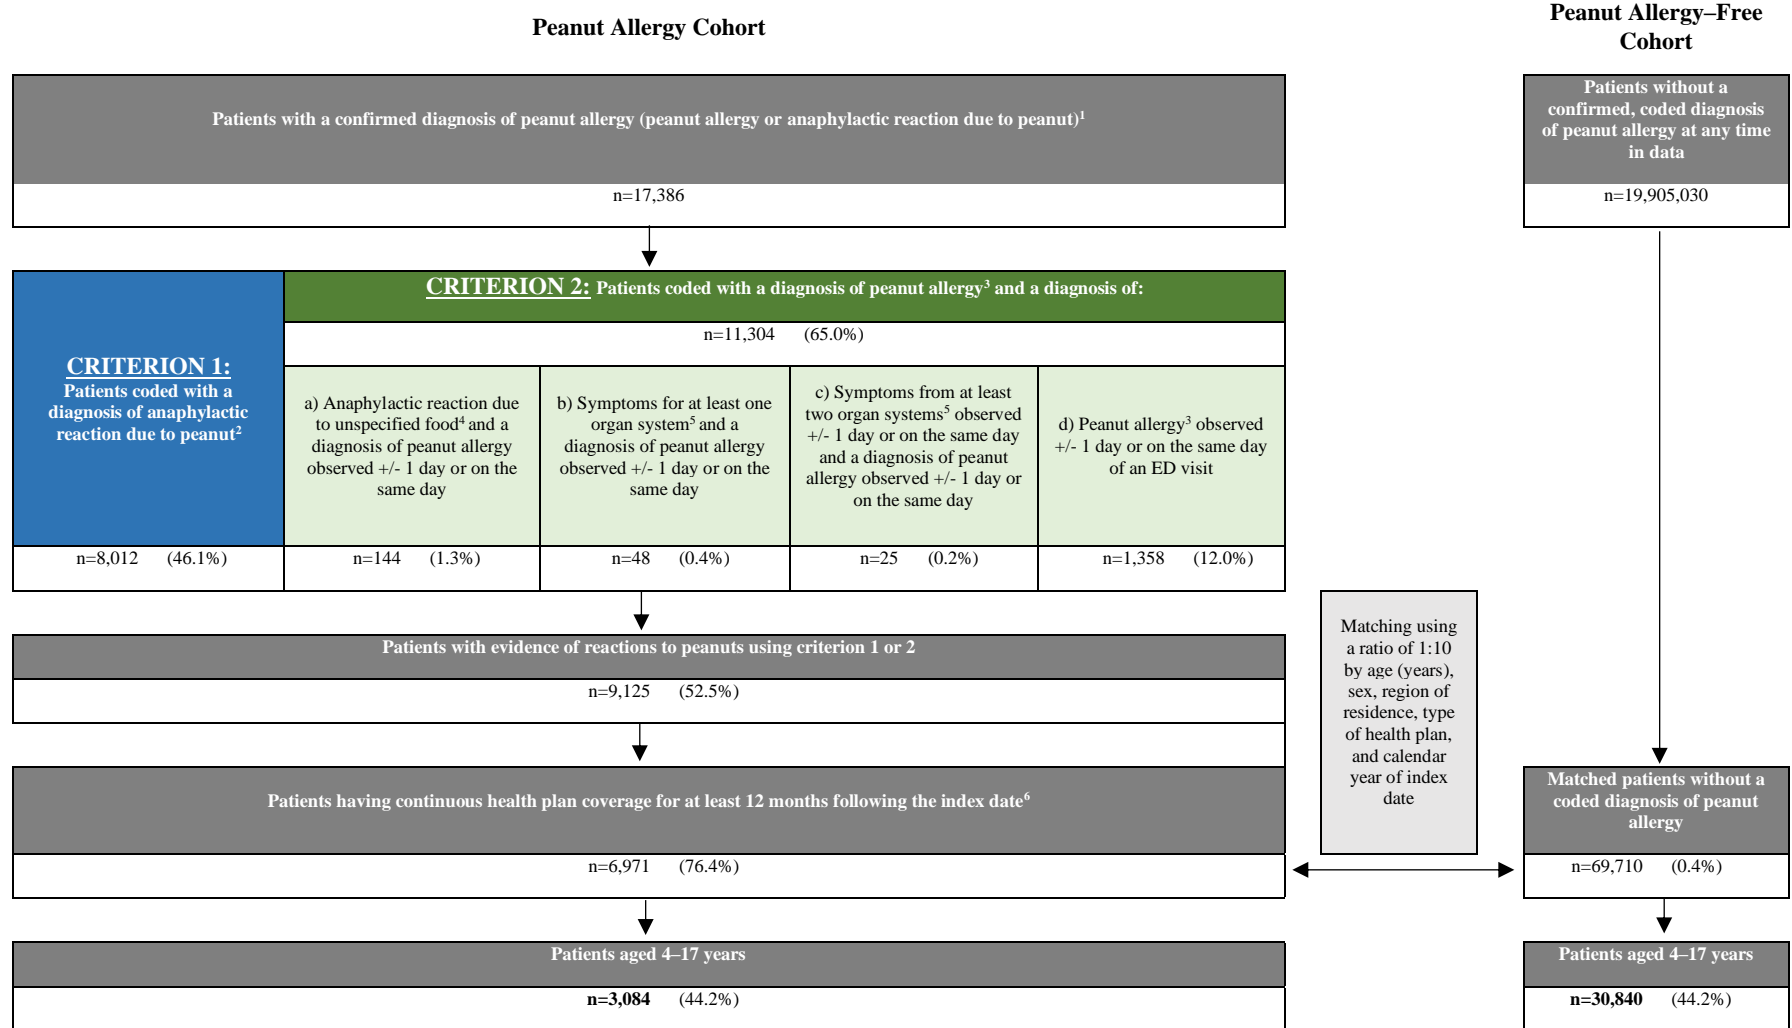

1. Confirmed peanut allergy was identified using ICD-9-CM codes 995.61 and V15.01, and ICD-10-CM codes T78.01xx and Z91.010.

2. Diagnosis for anaphylactic reaction due to peanut allergy was identified using ICD-9-CM code 995.61, or ICD-10-CM codes starting from T78.01.
3. Diagnosis for peanut allergy was identified using ICD-9-CM code V15.01, or ICD-10-CM codes starting from Z91.010.
4. Unspecified food anaphylactic reaction was identified using ICD-9-CM codes 995.6, 995.60, and V15.0; and ICD-10-CM codes T78.0, Z91.00xx, and Z91.01.
5. Symptoms considered as being reactions to peanuts using grading system (e.g., World Allergy Organization Guidelines; **Supplementary Table 1**).
6. Of 7,053 eligible patients with evidence of reactions to peanuts, 82 (1.2%) patients could not be matched and therefore were removed from the study sample.

ED, emergency department; ICD-9/10-CM, International classification of diseases, 9th/10th revision, clinical modification.



**Supplementary Figure 2. Sample Selection Among Medicaid Patients**

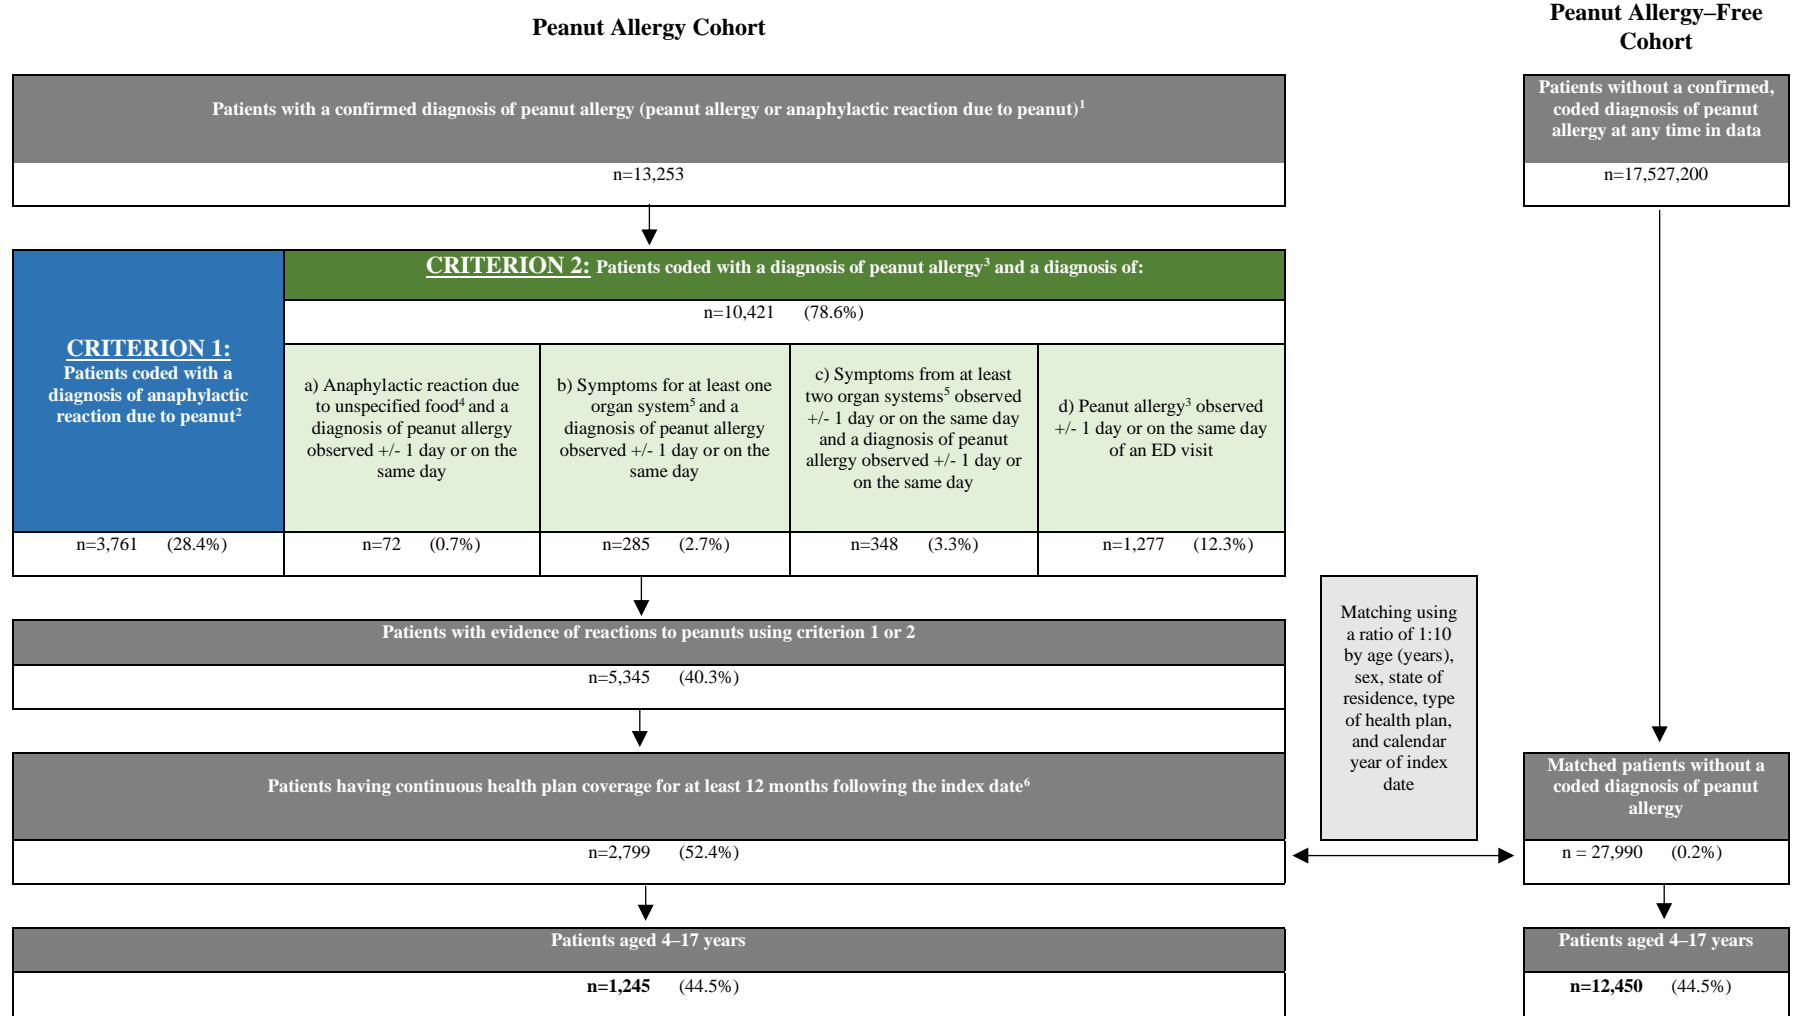

1. Confirmed peanut allergy was identified using ICD-9-CM codes 995.61 and V15.01, and ICD-10-CM codes T78.01xx and Z91.010.
2. Diagnosis for anaphylactic reaction due to peanut allergy was identified using ICD-9-CM code 995.61, or ICD-10-CM codes starting from T78.01.
3. Diagnosis for peanut allergy was identified using ICD-9-CM code V15.01, or ICD-10-CM codes starting from Z91.010.
4. Unspecified food anaphylactic reaction was identified using ICD-9-CM codes 995.6, 995.60, and V15.0; and ICD-10-CM codes T78.0, Z91.00xx, and Z91.01.
5. Symptoms considered as being reactions to peanuts using grading system (e.g., World Allergy Organization Guidelines; **Supplementary Table 1**).
6. Of 2,898 eligible patients with evidence of reactions to peanuts, 99 (3.4%) patients could not be matched and therefore were removed from the study sample.

ED, emergency department; ICD-9/10-CM, International classification of diseases, 9th/10th revision, clinical modification.
